# Supplementary material for: PREHAB study: a protocol for a prospective randomised clinical trial of exercise therapy for people living with frailty having cancer surgery
Source: PubMed Central journal article supplement — BMJ Open. 2018 Jun 22;8(6):e022057. doi: 10.1136/bmjopen-2018-022057 (PMC6020976; doi:10.1136/bmjopen-2018-022057), 2018-06-22
Supplement: bmjopen-2018-022057supp003.pdf [file bmjopen-2018-022057supp003.pdf]

## All items from the World Health Organization Trial Registration Data Set

| Data category                                 | Information                                                                                                                                                                                                                                                                                                     |
|-----------------------------------------------|-----------------------------------------------------------------------------------------------------------------------------------------------------------------------------------------------------------------------------------------------------------------------------------------------------------------|
| Primary registry and trial identifying number | ClinicalTrials.gov<br>NCT02934230                                                                                                                                                                                                                                                                               |
| Date of registration in primary registry      | August 22, 2016                                                                                                                                                                                                                                                                                                 |
| Secondary identifying numbers                 | Not Applicable                                                                                                                                                                                                                                                                                                  |
| Source(s) of monetary or material support     | International Anesthesia Research Society<br>The University of Ottawa Department of Anesthesiology and Pain Medicine                                                                                                                                                                                            |
| Primary sponsor                               | The Ottawa Hospital Research Institute                                                                                                                                                                                                                                                                          |
| Secondary sponsor                             | Investigator-led, Dr. Daniel McIsaac                                                                                                                                                                                                                                                                            |
| Contact for public queries                    | DM, <a href="mailto:dmcisaac@toh.ca">dmcisaac@toh.ca</a>                                                                                                                                                                                                                                                        |
| Contact for scientific queries                | DM, <a href="mailto:dmcisaac@toh.ca">dmcisaac@toh.ca</a>                                                                                                                                                                                                                                                        |
| Public title                                  | The Prehabilitation Study: Exercise Before Surgery to Improve Patient Function in People                                                                                                                                                                                                                        |
| Scientific title                              | The Prehabilitation Study: Exercise Before Surgery to Improve Patient Function in People                                                                                                                                                                                                                        |
| Countries of recruitment                      | Canada                                                                                                                                                                                                                                                                                                          |
| Health condition(s) or problem(s) studied     | Cancer, Frailty                                                                                                                                                                                                                                                                                                 |
| Intervention(s)                               | Exercise prehabilitation                                                                                                                                                                                                                                                                                        |
| Key inclusion and exclusion criteria          | Ages eligible for study: $\geq 60$ years<br>Sexes eligible for study: both<br>Accepts health volunteers: no                                                                                                                                                                                                     |
|                                               | Inclusion criteria: adult patient ( $\geq 60$ years), elective surgery for intraabdominal or thoracic cancer, Clinical Frailty Score ( $\geq 4/9$ )                                                                                                                                                             |
|                                               | Exclusion criteria: unable to communicate in written or oral form in official languages serviced by The Ottawa Hospital (English or French), unwilling to participate in home-based exercise prehabilitation, major cardiac risk factors, scheduled to undergo surgery in fewer than 3 weeks from randomization |
| Study type                                    | Interventional                                                                                                                                                                                                                                                                                                  |
|                                               | Allocation: randomized intervention model. Parallel assignment masking: double blind (investigator and outcome assessors)                                                                                                                                                                                       |
|                                               | Primary purpose: prevention                                                                                                                                                                                                                                                                                     |
| Date of first enrolment                       | January 19, 2017                                                                                                                                                                                                                                                                                                |
| Target sample size                            | 200                                                                                                                                                                                                                                                                                                             |
| Recruitment status                            | Recruiting                                                                                                                                                                                                                                                                                                      |
| Primary outcome(s)                            | Postoperative functional capacity (6-Minute Walk Test)                                                                                                                                                                                                                                                          |
| Key secondary outcomes                        | Functional mobility, patient-reported health related quality of life and disability free survival                                                                                                                                                                                                               |
